# Supplementary material for: Multi-temporal landslide activity investigation by spaceborne SAR interferometry: Polish Carpathians case study
Source: Copernicus journal article supplement (doi:10.5194/nhess-2020-112), 2020-04-17
Supplement: Supplementary file 1 [file nhess-2020-112-supplement.pdf]

## Geological units explanation

### Quaternary units

1. peat and ground soils
2. calcareous tumbles
3. gravel, sands and clays, oras dregs of the valley bottoms
4. clay, slits with admixture pf sands and alluvial soils, river sands and gasses of flooding and overflow terraces 1-5 m on the river bank
5. rock rubbles in situ
6. sands and weathering clays.
7. clays, sands, clays, sometimes with congregational and deluvial rubble.
8. landslide colluviums
9. loess-like clays
10. gravel, sands and river clays, erosive and storage terraces. 6-13 m on the river bank.
11. gravel, sands and river clays, erosive and storage terraces. 15-30 m on the river bank.
12. boulders, gravel & water type sand
13. gravel, sands and river clays, erosive and storage terraces. 35-60m on the river bank.
14. gravel, sands and river clays, erosive and storage terraces. 65-80 m on the river bank.
15. gravel, sands and river clays, erosive and storage terraces.85-110 m on the river bank.

### Transgressive Miocene on the Carpathian flysch (Tertiary period- neocen)

16. Conglomerates and sandstones with clay liner – formation Beli
17. Clay, slits from inserts, lignite lenses –formation from Iwkowej

### Under Silesian Nappe in the coal facies (Tertiary period Upper Cretaceous- Paleocene)

18. Spotted marl in coal

### Under Silesian series in Frydecka facies (Tertiary period Upper Cretaceous and Paleocene)

19. Thick-bedded sandstone and shale sandstones from Rajbrot
20. gray marl from exotic frydeckie
21. Marl from Żegociny

### Silesian Nappe (Tertiary period - Paleocene)

22. Shale and sandstones
23. Darkish limestone
24. Medium-thick and semi-thin sandstone and shale
25. Shale, sandstone, chert, marl, and conglomerate-menilite layers
26. Globigerina marl
27. Sandstone and shale –hieroglyph layers
28. Sandstone and shale-heavy type sandstone
29. Shale with thick-bedded and medium-bedded sandstone inserts
30. Sandstone and conglomerate- upper Istebna sandstone
31. Shale with thin-bedded sandstone inserts
32. Istebna shale with lower layers from upper Istebna

### Silesian Nappe (Upper Cretaceous)

33. Sandstone and conglomerate- lower Istebna layers
34. Thin, thick and medium-bedded sandstone, seated conglomerate-unseparated Godulskie layers
35. Medium and thick-bedded sandstone, conglomerate and shale-Godulskie layers
36. Medium and thin-bedded sandstone and shale-Godulskie layers
37. Godulskie spotted shale

### **Silesian Nappe (Lower Cretaceous)**

38. Sandstone and shale-Igockie layers
39. Rzewów shales
40. Sandstone-Grodziskie layers
41. Shale with thin-bedded sandstone inserts- upper Cieszyn shales

### **Under Magura Nappe**

#### **Dukielskie series (Tertiary period - Palaeogene)**

42. Thick-bedded sandstone- Cergowa sandstone
43. shales menilite and lower Cergowa marl
44. shales or shale and sandstone-hieroglyphs and green shale

#### **Grybów and Michalczowej Unit(Tertiary period - Palaeogene)**

44. Tylawskie limestone
45. Sandstone and shale
46. Shale, chert, sandstone-Grybowski layers
47. Organodetic limestone and sandstone- Luzanskie limestone and Michalczowej sandstone
48. Marn shale, sandstone, lower Grybowski marl
49. Shale and sandstone-hieroglophy layers
50. Spotted shale
51. Thin and medium-bedded sandstones and shales-layers of Jawoveret/inoceramic in biotit
52. facies

#### **Magura Nappe (Tertiary period - Palaeogene)**

54. Sandstone and shale-Magura layers in glauconite faction
55. Shales within the Magura sandstone in the muscovite facies
56. Thick-bedded sandstones and shales- Magura sandstone in the muscovite facies
57. Chert
58. Pelic limestone
59. Shale, marl, sandstone-Zembrzyckie submarine layers
60. Low, medium and medium- bedded shales and sandstones-hieroglyphic layers
61. Ciezkowice sandstones in the Magura sandstone form of Wojakowa
62. Spotted shale
63. Thin and medium-bedded sandstones and shales-layers of Jawoveret/inoceramic layers in the biotite facies
64. Medium and thin-bedded sandstones and shales-layers of Kanina
65. Marl and spotted shale
  
66. Claystone and sandstone\*
67. Marl and limestone\*
68. Rzewow shale and sandstone strongholds\*
69. Limestone\*
70. Rocky Limestones and dolomites\*
71. Limestones and dolomites\*
